# Supplementary material for: Extreme Wildfire occurrence in response to Global Change typeDroughts in the Northern Mediterranean
Source: Copernicus journal article supplement (doi:10.5194/nhess-2017-415), 2017-12-06
Supplement: Supplementary file [file nhess-2017-415-AC1-supplement.pdf]

I read with great interest the manuscript "Extreme Wildfire occurrence in response to Global Change type Droughts in the Northern Mediterranean". This study evaluates the climatology of extreme wildfires in Mediterranean France and identified the emergence of new generations of fires expected with global change type droughts. Overall, the paper is interesting and it is carefully and clearly written. The conclusions are significant and can sustain the interest of a broad audience. To sum up, the authors make a convincing analysis of the problem and their manuscript deserves publication in NHESS.

We kindly thank the reviewer for the very positive appreciation of our manuscript.
